# Supplementary material for: A programmed cell death-related gene signature to predict prognosis and therapeutic responses in liver hepatocellular carcinoma
Source: Springer Nature journal article supplement (doi:10.1007/s12672-024-00924-2), 2024-03-11

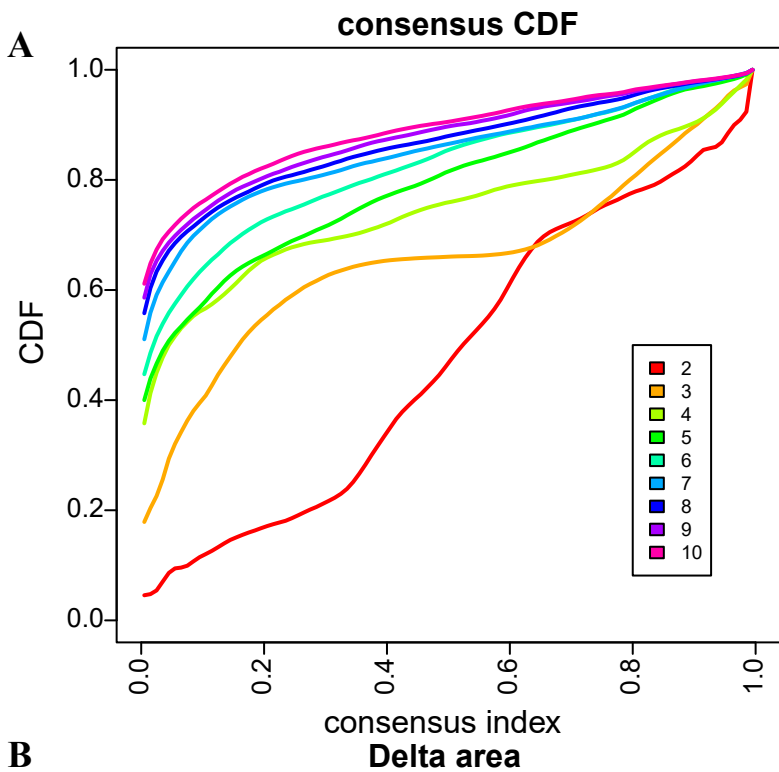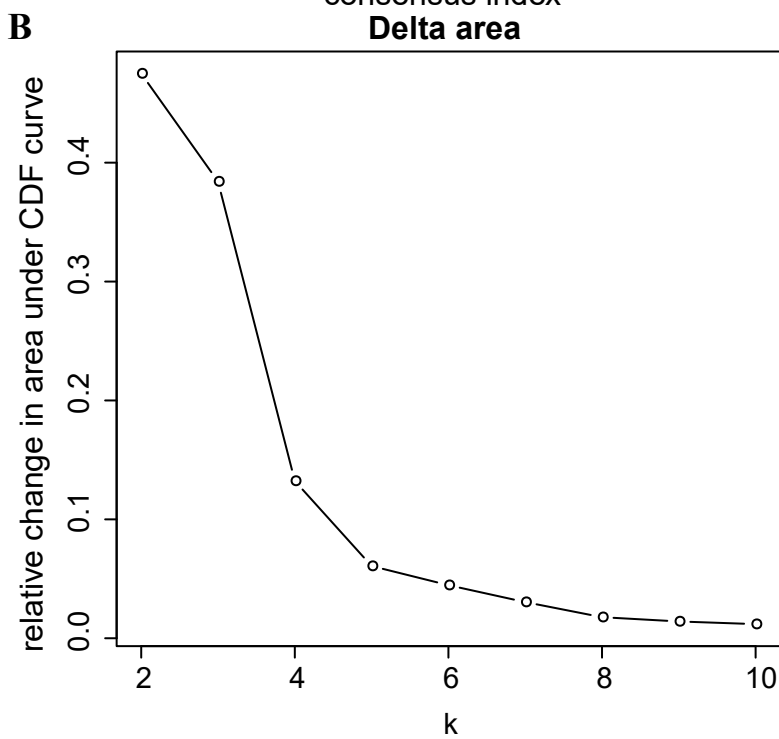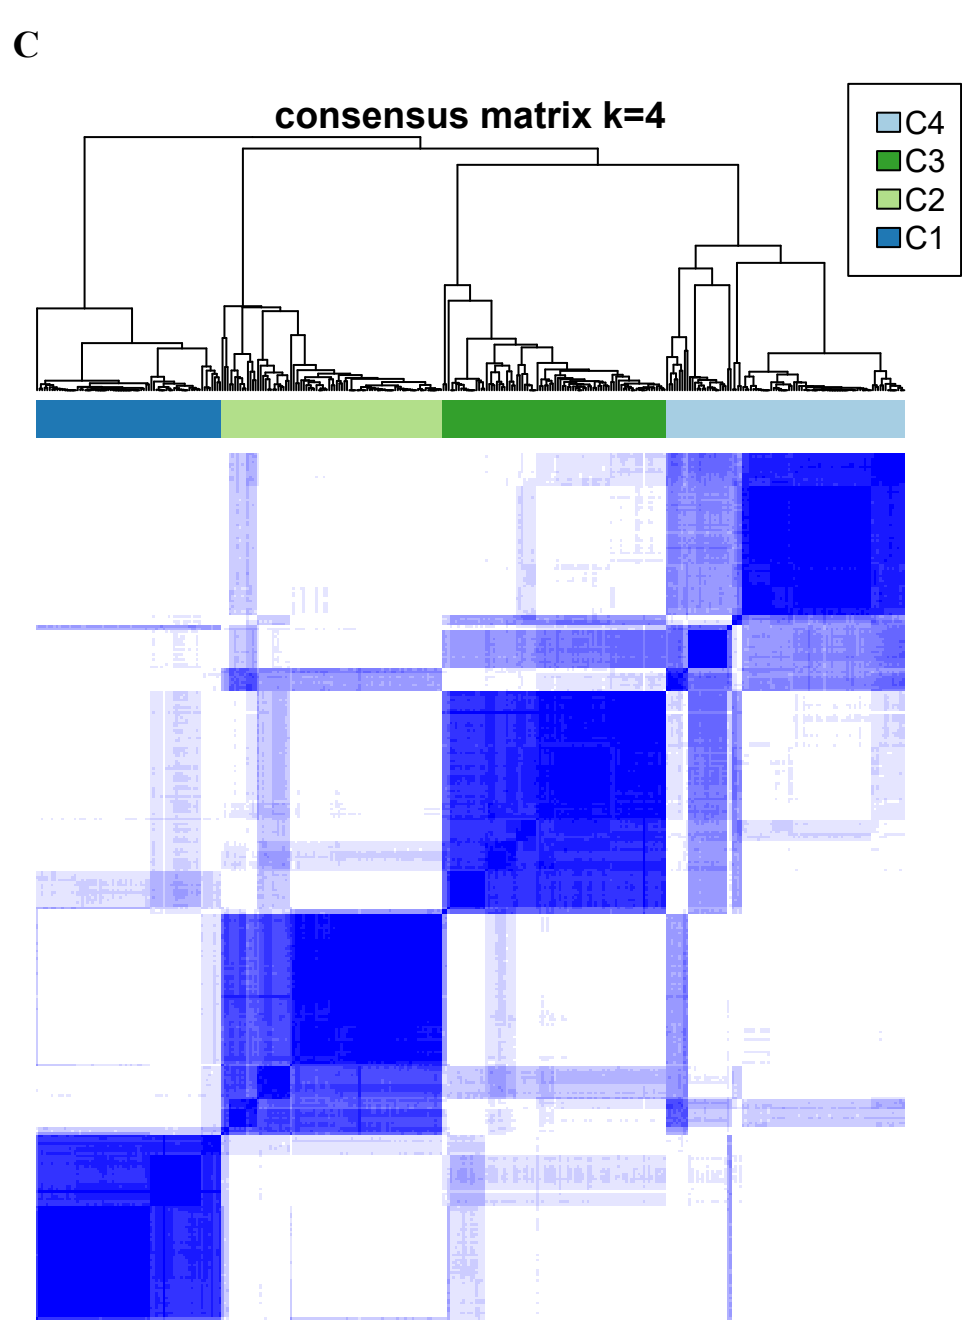

Supplement: MOESM1 [file 26840360]
