# Supplementary material for: A programmed cell death-related gene signature to predict prognosis and therapeutic responses in liver hepatocellular carcinoma
Source: Springer Nature journal article supplement (doi:10.1007/s12672-024-00924-2), 2024-03-11
Supplement: MOESM2 [file 26840360]

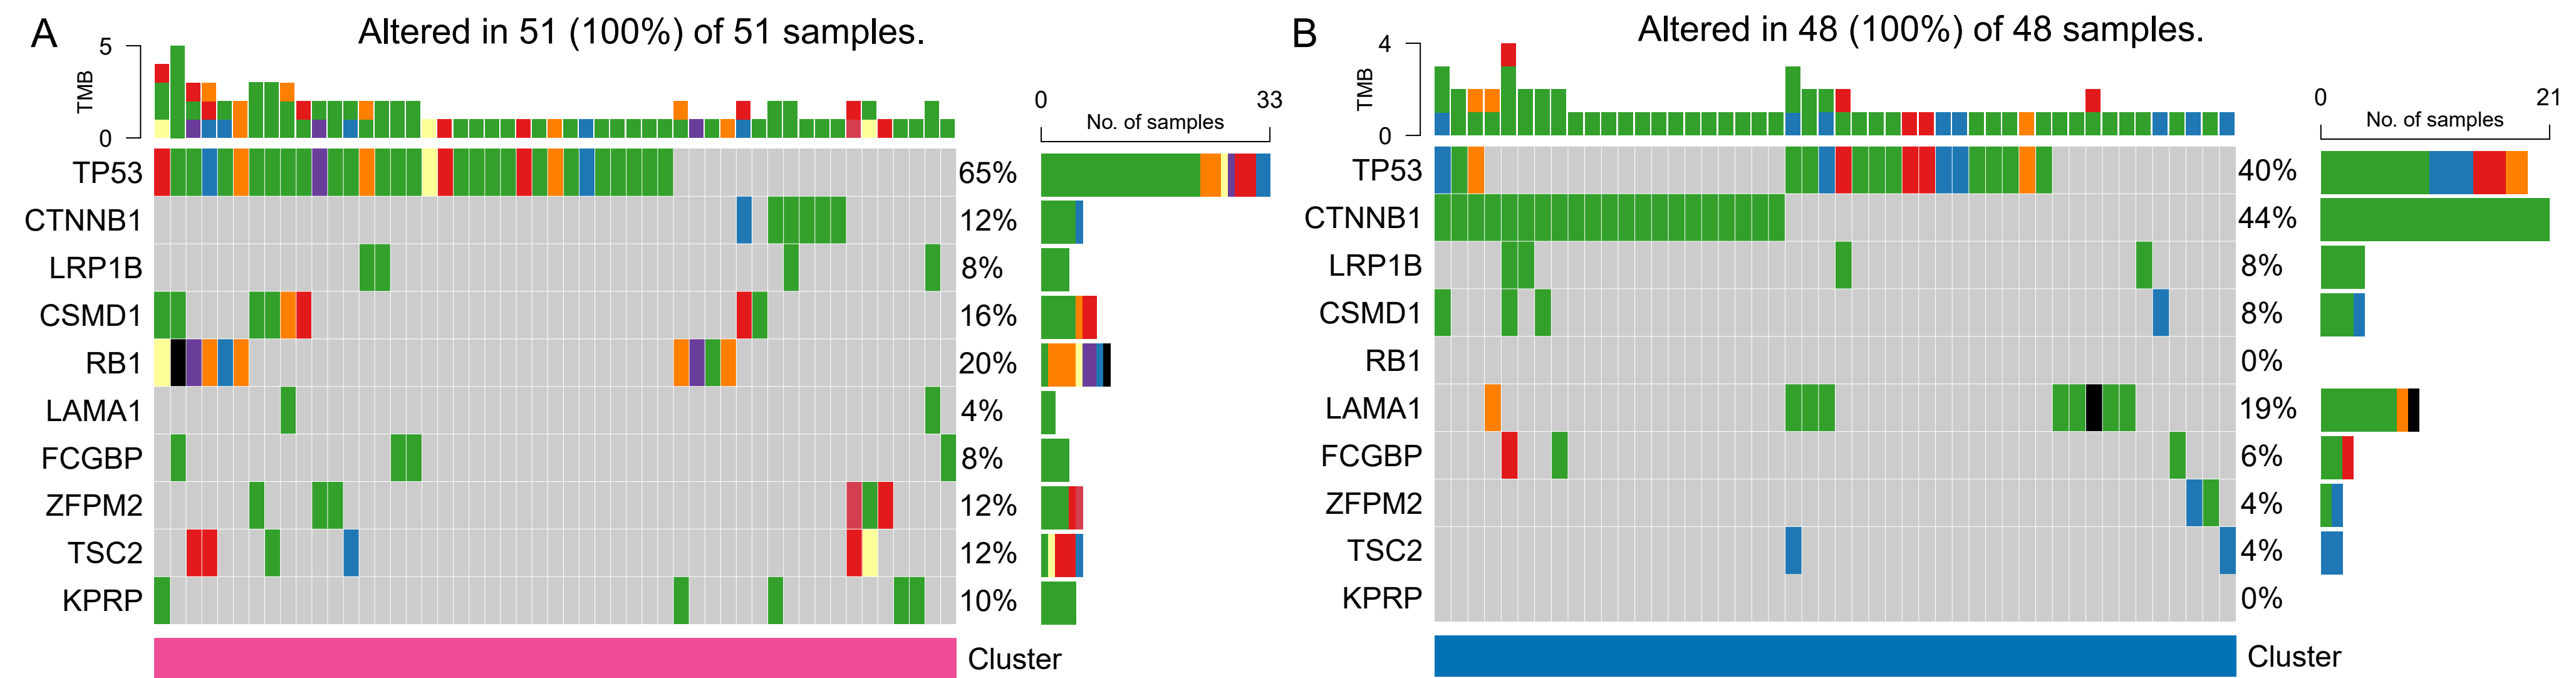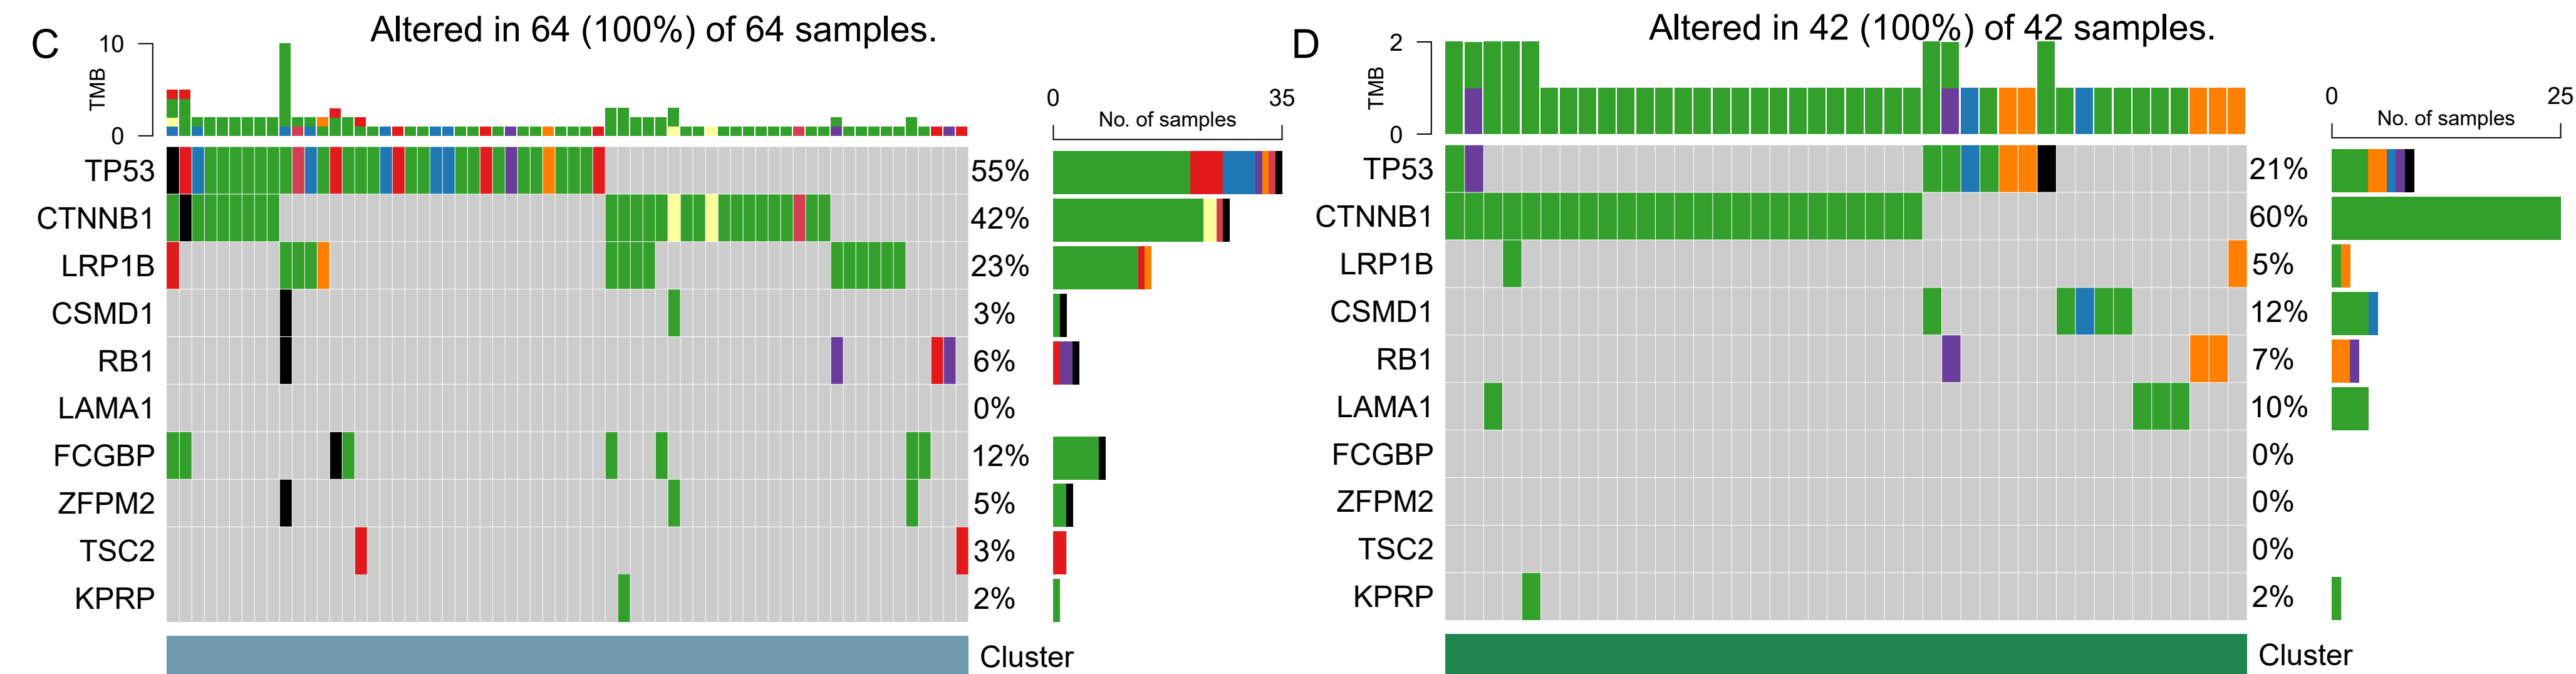

■ Missense\_Mutation   
 ■ Frame\_Shift\_Ins   
 ■ Frame\_Shift\_Del   
 ■ In\_Frame\_Ins   
 Cluster ■ C1 ■ C2  
■ Nonsense\_Mutation   
 ■ Splice\_Site   
■ In\_Frame\_Del   
■ Multi\_Hit   
■ C3 ■ C3
